# Supplementary material
Source: MDPI journal article supplement (https://www.mdpi.com/1999-4907/14/9/1767)
Supplement: s1 [file s1]

**Table S1.** Environmental variables used in this study

| Category   | Variable  | Description                                              | Unit               |
|------------|-----------|----------------------------------------------------------|--------------------|
| Climate    | bio1      | Annual Mean Temperature                                  | °C                 |
|            | bio2      | Mean Diurnal Range (mean of monthly (max temp-min temp)) | °C                 |
|            | bio3      | Isothermality (bio2/bio7) (*100)                         | /                  |
|            | bio4      | Temperature Seasonality (standard deviation*100)         | /                  |
|            | bio5      | Max Temperature of the Warmest Month                     | °C                 |
|            | bio6      | Min Temperature of the Coldest Month                     | °C                 |
|            | bio7      | Temperature Annual Range (bio5- bio6)                    | °C                 |
|            | bio8      | Mean Temperature of the Wettest Quarter                  | °C                 |
|            | bio9      | Mean Temperature of the Driest Quarter                   | °C                 |
|            | bio10     | Mean Temperature of the Warmest Quarter                  | °C                 |
|            | bio11     | Mean Temperature of the Coldest Quarter                  | °C                 |
|            | bio12     | Annual Precipitation                                     | mm                 |
|            | bio13     | Precipitation of the Wettest Month                       | mm                 |
|            | bio14     | Precipitation of the Driest Month                        | mm                 |
|            | bio15     | Precipitation Seasonality (coefficient of variation)     | /                  |
|            | bio16     | Precipitation of the Wettest Quarter                     | mm                 |
|            | bio17     | Precipitation of the Driest Quarter                      | mm                 |
|            | bio18     | Precipitation of the Warmest Quarter                     | mm                 |
|            | bio19     | Precipitation of the Coldest Quarter                     | mm                 |
| Topography | Elevation |                                                          | m                  |
|            | Slope     |                                                          | °                  |
|            | Aspect    |                                                          | rad                |
| Soil       | t-AWC     | Topsoil-Available Water Capacity                         | %                  |
|            | t-texture | Topsoil Soil Texture                                     | /                  |
|            | t-bulk    | Topsoil Bulk Density                                     | kg/dm <sup>3</sup> |
|            | t-ph      | Topsoil pH (H <sub>2</sub> O)                            | /                  |
|            | t-ece     | Topsoil Electrical Conductivity                          | /                  |
|            | t-sand    | Topsoil Sand Fraction                                    | %                  |
|            | t-clay    | Topsoil Clay Fraction                                    | %                  |
|            | t-oc      | Topsoil Organic Carbon                                   | /                  |
|            | t-silt    | Topsoil Silt Fraction                                    | %                  |
|            | t-esp     | Topsoil Sodicity (ESP-Exchangeable Sodium Percentage)    | %                  |
|            | t-gravel  | Topsoil Gravel Content                                   | %                  |

**Table S2.** The performance of Maxent model using default settings and optimized settings by ENMeval

| settings  | regularization multiplier | feature combination | avg.test.AUC | avg.diff.AUC | avg.OR10 | delta.AICc |
|-----------|---------------------------|---------------------|--------------|--------------|----------|------------|
| default   | 1.5                       | LQH                 | 0.8071       | 0.0802       | 0.2839   | 324.5774   |
| optimized | 3.5                       | LQ                  | 0.8099       | 0.0436       | 0.1357   | 0          |

**Table S3.** The contribution and permutation importance of 16 environmental factors

| Factors   | Description                                          | Percent          | Permutation    |
|-----------|------------------------------------------------------|------------------|----------------|
|           |                                                      | contribution (%) | importance (%) |
| bio6      | Min Temperature of Coldest Month                     | 66.02            | 65.06          |
| elevation |                                                      | 28.73            | 25.04          |
| bio11     | Mean Temperature of Coldest Quarter                  | 1.33             | 2.21           |
| t-ph      | Topsoil pH (H <sub>2</sub> O)                        | 0.75             | 1.25           |
| bio12     | Annual Precipitation                                 | 0.55             | 0.87           |
| slope     |                                                      | 0.49             | 0.13           |
| bio14     | Precipitation of Driest Month                        | 0.46             | 1.40           |
| bio2      | Mean Diurnal Range                                   | 0.34             | 1.26           |
| aspect    |                                                      | 0.30             | 0.54           |
| bio13     | Precipitation of Wettest Month                       | 0.22             | 0.26           |
| t-bulk    | Topsoil Bulk Density                                 | 0.21             | 0.27           |
| t-clay    | Topsoil Clay Fraction                                | 0.20             | 0.33           |
| bio15     | Precipitation Seasonality (Coefficient of Variation) | 0.18             | 0.46           |
| bio10     | Mean Temperature of Warmest Quarter                  | 0.17             | 0.00           |
| t-oc      | Topsoil organic carbon                               | 0.06             | 0.53           |
| bio1      | Annual Mean Temperature                              | 0.00             | 0.36           |
